# Supplementary material for: Proteomic analysis of cardiorespiratory fitness for prediction of mortality and multisystem disease risks
Source: PubMed Central journal article supplement (PMC11186767; doi:10.1038/s41591-024-03039-x), 2024-06-04

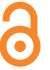

---

# Proteomic analysis of cardiorespiratory fitness for prediction of mortality and multisystem disease risks

---

In the format provided by the authors and unedited

---

**Proteomic analysis of cardiorespiratory fitness for prediction of mortality and multi-system disease risks**

**SUPPLEMENTAL MATERIAL**

**Supplemental Figure 1: Assessment of batch effect and participant outliers in CARDIA proteomics.** CARDIA proteomics were run on 38 plates over a 13 day period. Principal component analysis was used to examine whether there were any batch/plate effects in the CARDIA proteomics dataset as well as examine for any outlier observations.

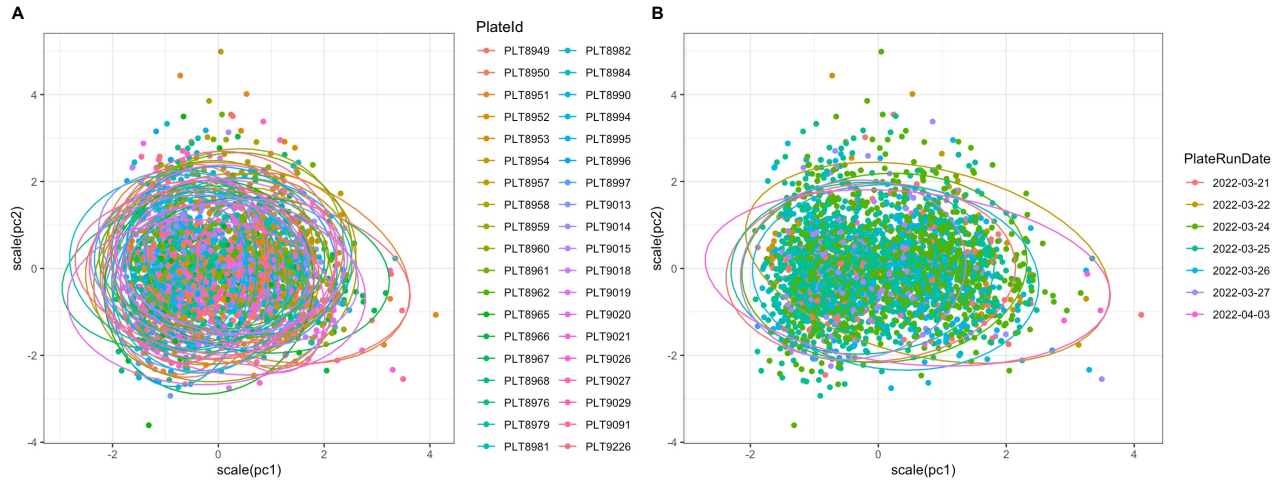

Supplement: 41591_2024_3039_MOESM1_ESM.pdf [file 41591_2024_3039_MOESM1_ESM.pdf]
